# Supplementary material for: Arabidopsis MAPKKK δ-1 is required for full immunity against bacterial and fungal infection
Source: PubMed Central journal article supplement (PMC7094076; doi:10.1093/jxb/erz556), 2019-12-17
Supplement: erz556_suppl_supplementary_tables_s1-s3.pdf [file erz556_suppl_supplementary_tables_s1-s3.pdf]

**Supplementary Table 1.** The primers used in this study

| Name           | Sequence (5' – 3')                           | Application                                         |
|----------------|----------------------------------------------|-----------------------------------------------------|
| MKD1F-1        | GCGAATTCATGGGTGGCCCCGTTGAAA                  | Yeast two-hybrid analysis                           |
| MKD1F-2        | GCCTCGAGGTTTGTCTCCTCTCGTCTGA                 | Yeast two-hybrid analysis, Complementation analysis |
| MKD1F-3        | GCGAATTCATGGGTGGCCCCGTTGAAA                  | Protein synthesis                                   |
| MKD1F-4        | GCGTCGACGTTTGTCTCCTCTCGTCTGA                 | Protein synthesis                                   |
| MKD1F-5        | CACCATGGGTGGCCCCGTTGAAA                      | BiFC analysis                                       |
| MKD1F-6        | CATCAAAGTTTCACTCGTATTC                       | BiFC analysis                                       |
| MKD1F-7        | GCCCCGGGCATGGGTGGCCCCGTTGAAA                 | GFP analysis                                        |
| MKD1F-8        | GCGCGCCGCTTACGTTTGCCAACATTCACG               | GFP analysis                                        |
| MKD1-9         | CACCGCATTGAGAAGTGGGATGCT                     | Northern blot analysis                              |
| MKD1-10        | AACCTCAGAAGGATCAGAG                          | Northern blot analysis                              |
| MKD1-11        | CTGGAAAGTTTGAACCCGA                          | Northern blot analysis                              |
| MKD1-12        | CTGGAAAGTTTGAACCCGA                          | Northern blot analysis                              |
| MKD1KD-1       | GCGCGATGCGCATGTGGGAAGATCTTCAGATTG            | Protein synthesis                                   |
| MKD1KD-2       | GTTTAAACTCAGTGGTGGTGGTGGTGGCTTATGTTTAGACCCTG | Protein synthesis                                   |
| MKD1KD-3       | GCCCCGGGGATGTGGGAAGATCTTCAGATTG              | Yeast two-hybrid analysis                           |
| MKD1KD-4       | GCCTCGAGTTAGCTTATGTTTAGACCCTG                | Yeast two-hybrid analysis                           |
| MKD1P-1        | GCAAGCTTCACAAGAGCAGAGGTTGGAG                 | GUS analysis, Complementation analysis              |
| MKD1P-2        | GCTCTAGATACCAGCATACATGGGAGAT                 | GUS analysis                                        |
| MKK1F-1        | GCCCCGGGGATGAACAGAGGAAGCTTATGC               | Yeast two-hybrid analysis, Protein synthesis        |
| MKK1F-2        | GCCTGCAGTAGTTAGCAAGTGGGGGAA                  | Yeast two-hybrid analysis, Protein synthesis        |
| MKK2F-1        | GCCCCGGGGATGAAGAAAGTGGATTACAGC               | Yeast two-hybrid analysis, Protein synthesis        |
| MKK2F-2        | GCCTGCAGTTACACGGAGAACGTACCAGAC               | Yeast two-hybrid analysis, Protein synthesis        |
| MKK3F-1        | GCCCCGGGGATGGCGGCATTGGAGGAGC                 | Yeast two-hybrid analysis                           |
| MKK3F-2        | GCCTGCAGCTAATCTAAGTTTGTAAATAAAAGC            | Yeast two-hybrid analysis                           |
| MKK4F-1        | GCCCCGGGGATGAGACCGATTCAATCGCC                | Yeast two-hybrid analysis                           |
| MKK4F-2        | GCCTGCAGCTATGTGTTGGAGAAGAAGA                 | Yeast two-hybrid analysis                           |
| MKK5F-1        | GCCCCGGGGATGAAACCGATTCAATCTCCTT              | Yeast two-hybrid analysis, Protein synthesis        |
| MKK5F-2        | GCCTGCAGCTAAGAGGCAGAAGGAAGAG                 | Yeast two-hybrid analysis, Protein synthesis        |
| MKK6F-1        | GCCCCGGGGATGGTGAAGATCAAATCGAACT              | Yeast two-hybrid analysis                           |
| MKK6F-2        | GCCTGCAGTTATCTAAGGTAGTTAACAGGTGG             | Yeast two-hybrid analysis                           |
| MKK7F-1        | GCCCCGGGGATGGCTCTTGTTCGTAACCGC               | Yeast two-hybrid analysis                           |
| MKK7F-2        | GCCTGCAGCTAAAGACTTTCACGGAGAAAAG              | Yeast two-hybrid analysis                           |
| MKK9F-1        | GCCCCGGGGATGGCTTTAGTACGTGAACGT               | Yeast two-hybrid analysis                           |
| MKK9F-2        | GCCTGCAGCTAAAGATCTTCCCGGAGAAA                | Yeast two-hybrid analysis                           |
| MKK10F-1       | GCCCCGGGGATGACACTTGTAGAGAACGAC               | Yeast two-hybrid analysis                           |
| MKK10F-2       | GCCTGCAGCTATCTGTTTTTACAAAAGAAT               | Yeast two-hybrid analysis                           |
| MKK1F-3        | CACCATGAACAGAGGAAGCTTATGC                    | BiFC analysis                                       |
| MKK1F-4        | TAGTTAGCAAGTGGGGGAA                          | BiFC analysis                                       |
| MKK2F-3        | CACCATGAAGAAAGTGGATTACAGC                    | BiFC analysis                                       |
| MKK2F-4        | TTACACGGAGAACGTACCAGAC                       | BiFC analysis                                       |
| MKK5F-3        | CACCATGAAACCGATTCAATCTCCTT                   | BiFC analysis                                       |
| MKK5F-4        | CTAAGAGGCAGAAGGAAGAG                         | BiFC analysis                                       |
| MKK5RNAiF-1    | CACCGCTTACCTATGAAGAACCG                      | MKK5RNAi                                            |
| MKK5RNAiF-2    | TCACTCGTTCTAGCTCGGAT                         | MKK5RNAi                                            |
| MPK3F-1        | GCCCCGGGTATGAACACCGCGGTGG                    | Yeast two-hybrid analysis                           |
| MPK3F-2        | GCGTCGACCTAACCGTATGTTGGATTGAGT               | Yeast two-hybrid analysis                           |
| MPK6F-1        | GCCCCGGGTATGGACGGTGGTTCAGGTC                 | Yeast two-hybrid analysis                           |
| MPK6F-2        | GCGTCGACCTATTGCTGATATTCTGGATTGA              | Yeast two-hybrid analysis                           |
| AtNFXL1F-3     | CACCATGAGCTTTCAAGTCAGGCG                     | BiFC analysis                                       |
| AtNFXL1F-4     | CTCACATACCTTCTCCAGT                          | BiFC analysis                                       |
| AtNFXL1F-1     | CGCCAT ATGAGCTTTCAAGTCAGGCG                  | Yeast two-hybrid analysis                           |
| AtNFXL1F-2     | GACGTCGACCTCACATACCTTCTCCAGT                 | Yeast two-hybrid analysis                           |
| AtNFXL1ΔC-1    | CGCCAT ATGAGCTTTCAAGTCAGGCG                  | Yeast two-hybrid analysis                           |
| AtNFXL1ΔC-2    | GACGTCGACTAGCGGTTATACGACCACATG               | Yeast two-hybrid analysis                           |
| AtNFXL1ΔN-1    | CGCCATATGAAGGAGGAGAATGTTGTGTTG               | Yeast two-hybrid analysis                           |
| AtNFXL1ΔN-2    | GACGTCGACCTCACATACCTTCTCCAGT                 | Yeast two-hybrid analysis                           |
| AtNFXL1ΔNΔZn-1 | CGCCATATGCATGTGGTCGTATAACCGCTA               | Yeast two-hybrid analysis, Protein preparation      |
| AtNFXL1ΔNΔZn-2 | GACGTCGACCTCACATACCTTCTCCAGT                 | Yeast two-hybrid analysis, Protein preparation      |
| MKK1 F-5       | CACCATGAACAGAGGAAGCTTATGC                    | GFP analysis                                        |
| MKK1 F-6       | TAGTTAGCAAGTGGGGGAA                          | GFP analysis                                        |
| MKK5 F-5       | CACCATGAAACCGATTCAATCTCCTT                   | GFP analysis                                        |
| MKK5F-6        | CTAAGAGGCAGAAGGAAGAG                         | GFP analysis                                        |
| MPK6 F-3       | CACCATGGACGGTGGTTCAGGTC                      | GFP analysis                                        |
| MPK6 F-4       | CTATTGCTGATATTCTGGATTGA                      | GFP analysis                                        |
| PR1F1          | ATTACTTCATTAGTAGTGCTTCT                      | RT-qPCR                                             |
| PR1F2          | CTTGTCTGGCGTCTCC                             | RT-qPCR                                             |
| ACT2/8 F1      | CATCACACTTCTACAATGAGCT                       | RT-qPCR                                             |
| ACT2/8 F2      | CGACCTTAATCTTCATGCTGC                        | RT-qPCR                                             |
| PDF1.2F1       | CACCCCTATCTTCGCTGCTC                         | RT-qPCR                                             |
| PDF1.2F2       | GTTGCATGATCCATGTTTGG                         | RT-qPCR                                             |

**Supplementary Table 2.** The phosphorylation sites of MKK1 and MKK5 by MKD1

|                    | Sequence                         | Modifications                                                    | $\Delta$ Mass | Prec MW   | Sc        |
|--------------------|----------------------------------|------------------------------------------------------------------|---------------|-----------|-----------|
| MKK1 (S46)         | QTVSLSEPGAPPIEPL                 | Phospho(S)@4; Oxidation(P)@13                                    | 0.0056        | 1826.8759 | 6         |
|                    | QTVSLSEPGAPPIEPLDN               | Oxidation(P)@13; Deamidated(N)@19                                | -0.1838       | 1976.774  | 9         |
|                    | QTVSLSEPGAPPIEPL                 |                                                                  | 0.0096        | 1730.9186 | 4         |
|                    | SEPGAPPIEPL                      | Oxidation(P)@8                                                   | -0.178        | 1218.4352 | 4         |
|                    | KDGDLRVNKDGIQTVSLSEPGAPPIEPL     |                                                                  | -0.304        | 3041.2993 | 11        |
|                    | KDGDLRVNKDGIQTVSLSEPGAPPIEPLDNQL |                                                                  | -0.3072       | 3511.5085 | 18        |
|                    | KDGDLRVNKDGIQTVSLSEPGAPPIEPLDNQL |                                                                  | -0.2389       | 3511.5769 | 12        |
|                    | MKK5 (T83)                       | SELERVNRIKSGAGGTVY                                               | Phospho(T)@16 | -0.131    | 1943.7792 |
| SELERVNRIKSGAGGTVY |                                  |                                                                  | -0.1321       | 1863.8118 | 12        |
| GSGAGGTVY          |                                  |                                                                  | 0.1133        | 767.4583  | 3         |
| GSGAGGTVY          |                                  |                                                                  | 0.1219        | 767.4669  | 4         |
| GSGAGGTVY          |                                  |                                                                  | 0.1186        | 767.4636  | 3         |
| GSGAGGTVY          |                                  |                                                                  | 0.1343        | 767.4792  | 3         |
| GSGAGGTVY          |                                  |                                                                  | 0.139         | 767.484   | 4         |
| GSGAGGTVY          |                                  |                                                                  | 0.1388        | 767.4838  | 3         |
| MKK5 (T215)        | GVSRIQAQTMPCNSSVGTIAY            | Phospho(T)@9; Carbamidomethyl(C)@13; Methyl(N)@14; Phospho(T)@19 | -0.1496       | 2512.9236 | 9         |
| MKK5 (S256)        | AGDVWVSLGVSIL                    | Trp->Met@5; Phospho(S)@10                                        | -0.0317       | 1240.5457 | 8         |
|                    | NHGRYDGYAGDVWVSLGVSILEFY         | Deamidated(R)@4                                                  | -0.1917       | 2731.1001 | 3         |
|                    | SLGVSILEF                        |                                                                  | -0.063        | 963.4647  | 14        |
|                    | SLGVSILEF                        |                                                                  | -0.0612       | 963.4666  | 14        |
|                    | SLGVSILEF                        |                                                                  | -0.0539       | 963.4738  | 14        |
|                    | SLGVSILEF                        |                                                                  | -0.0697       | 963.458   | 13        |
|                    | SLGVSILEFY                       |                                                                  | -0.0834       | 1126.5076 | 15        |
|                    | SLGVSILEFY                       |                                                                  | -0.0766       | 1126.5144 | 16        |
|                    | SLGVSILEFY                       |                                                                  | -0.0877       | 1126.5033 | 16        |
| SLGVSILEFY         |                                  | -0.086                                                           | 1126.505      | 16        |           |

Sc shows the score that is a count of the MS/MS peaks that match to a theoretical ion, for those ion types considered by the Paragon™ Algorithm.

**Supplementary Table 3.** The phosphoproteomic analysis using root in T-2 toxin-treated *mkd1* mutant

| <i>mkd1</i> /WT | Description                                                                 | AGI       | % Cov. | Total |
|-----------------|-----------------------------------------------------------------------------|-----------|--------|-------|
| 0.30            | Maternal effect embryo arrest 58 (MEE58)                                    | AT4G13940 | 1.6    | 2.0   |
| 0.48            | Copper chaperone (CCH)                                                      | AT3G56240 | 57.9   | 4.2   |
| 0.54            | Small ubiquitin-like modifier 2 (SUMO2)                                     | AT5G55160 | 30.1   | 6.0   |
| 0.58            | NADH-ubiquinone oxidoreductase-related                                      | AT5G52840 | 16.0   | 2.0   |
| 0.59            | Cobalamin-independent methionine synthase*                                  | AT5G17920 | 24.8   | 12    |
| 0.62            | Putative heat-shock protein                                                 | AT3G07770 | 13.1   | 7.8   |
| 0.63            | Small ubiquitin-like modifier 1 (SUMO1)                                     | AT4G26840 | 30.8   | 6.0   |
| 0.64            | Unknown protein                                                             | AT1G13930 | 39.4   | 6.7   |
| 0.65            | Malate dehydrogenase                                                        | AT1G04410 | 35.2   | 16    |
| 0.68            | Calmodulin 1 (CAM1)                                                         | AT5G37780 | 68.3   | 18    |
| 0.68            | Strong similarity to 60S ribosomal protein L17 (gb X01694)                  | AT3G04400 | 11.5   | 4.0   |
| 0.68            | Spermidine synthase 1 (SPDS1)                                               | AT1G23820 | 12.2   | 6.0   |
| 0.69            | Glycine-rich protein 2*                                                     | AT4G38680 | 37.7   | 2.4   |
| 0.69            | Glutamine synthetase, putative                                              | AT1G66200 | 5.9    | 3.5   |
| 0.70            | Translationally controlled tumor protein (TCTP)                             | AT3G16640 | 58.3   | 16    |
| 0.70            | Pentatricopeptide repeat-containing protein                                 | AT1G12300 | 11.7   | 11    |
| 0.71            | Glycine-rich RNA binding protein                                            | AT2G21660 | 45.1   | 2.0   |
| 0.71            | Nuclear RNA binding protein A-like protein *                                | AT5G47210 | 39.2   | 6.7   |
| 0.71            | PDI-LIKE 2-3 (ATPDIL2-3)                                                    | AT2G32920 | 4.3    | 2.9   |
| 0.71            | Unknown protein*                                                            | AT2G32920 | 3.3    | 2.1   |
| 0.71            | S-adenosylmethionine synthetase                                             | AT1G02500 | 42.1   | 15    |
| 0.71            | ATNADP-ME3 (NADP-malic enzyme 3)                                            | AT5G25880 | 9.4    | 2.1   |
| 0.72            | TRF-LIKE 5 (TRFL5)                                                          | AT1G15720 | 4.9    | 2.0   |
| 0.72            | Early-responsive to dehydration 2 (ERD2)*                                   | AT1G56410 | 30.3   | 33    |
| 0.72            | NADH-dependent glutamate synthase*                                          | AT5G53460 | 7.8    | 3.3   |
| 0.72            | Vacuolar calcium-binding protein-like protein                               | AT1G12080 | 36.2   | 4.0   |
| 0.73            | Heat shock factor binding protein                                           | AT4G15802 | 14.0   | 2.0   |
| 0.73            | Disease resistance protein RPP13 variant                                    | AT3G46530 | 7.1    | 2.1   |
| 0.74            | Glutathione s-transferase phi 9 (ATGSTF9)                                   | AT2G30860 | 30.7   | 4.0   |
| 0.74            | Putative 2,3-bisphosphoglycerate-independent phosphoglycerate mutase        | AT1G09780 | 13.8   | 5.7   |
| 0.74            | ATPases associated with various cellular activities                         | AT1G03000 | 3.3    | 2.1   |
| 0.74            | Flavonol synthase 5 (FLS5)*                                                 | AT5G63600 | 5.2    | 2.0   |
| 0.75            | Embryo defective 2296 (EMB2296)*                                            | AT2G18020 | 54.7   | 21    |
| 0.75            | Hydrogen ion transporting ATP synthase                                      | AT1G20260 | 25.5   | 9.3   |
| 1.32            | Nucleosome assembly protein1;1 (NAP1;1)                                     | AT4G26110 | 40.9   | 14    |
| 1.35            | Reticulan like protein B1 (RTNLB1)                                          | AT4G23630 | 20.7   | 3.8   |
| 1.35            | Reticulan like protein B3 (RTNLB3)                                          | AT1G64090 | 7.8    | 4.0   |
| 1.37            | Putative heat shock protein 81-2 (HSP81-2)                                  | At5g56030 | 57.4   | 75    |
| 1.45            | Similar to acidic ribosomal protein p1                                      | AT4G00810 | 59.1   | 5.9   |
| 1.50            | Ubiquitin extension protein, putative / 40S ribosomal protein S27A (RPS27a) | AT1G23410 | 46.2   | 11    |
| 1.50            | Tubulin alpha-3                                                             | AT5G1977  | 32.4   | 20    |
| 1.68            | Glyceraldehyde-3-phosphate dehydrogenase of plastid (GAPCP-1)               | AT1G79530 | 21.8   | 4.2   |
| 1.73            | 60S acidic ribosomal protein P1-like protein                                | AT5G47700 | 57.5   | 5.9   |
| 2.60            | Dehydrin family protein                                                     | AT1G54410 | 18.4   | 2.0   |
| 4.10            | Forkhead-associated domain-containing protein / FHA domain-containing prot  | AT5G47790 | 4.1    | 2.0   |
| 5.07            | Heat shock protein 90A *                                                    | AT5G52640 | 34.9   | 28    |
| 11.2            | Heat shock protein 70B (Hsp70b)*                                            | AT1G16030 | 25.7   | 16    |

The ratio of *mkd1*/WT shows the fold-change in phosphoprotein expression between WT and *mkd1* mutant after T-2 toxin treatment. Data are mean of 3 independent experiments.

These phosphoproteins were statistically significant ( $P < 0.05$ ) and  $< 0.75$  or  $> 1.33$  fold change in expression between the *mkd1* mutant and WT. % Cov (Coverage) shows the percentage of

matching amino acids from identified peptides having Confidence greater than 0 divided by the total number of amino acids in the sequence. Total (ProtScore) shows a measure of the total amount of evidence for a detected protein. Total ProtScore is calculated using all of the peptides detected for the protein. Asterisks show the proteins that was detected the phosphopeptide.
